# Supplementary material for: Uncovering the Molecular Basis for the Better Gefitinib Sensitivity of EGFR with Complex Mutations over Single Rare Mutation: Insights from Molecular Simulations
Source: MDPI journal article supplement (doi:10.3390/molecules27123844), 2022-06-15
Supplement: s1 [file s1]

# Uncovering the molecular basis for the better Gefitinib sensitivity of EGFR with complex mutations over single rare mutation: insights from molecular simulations

Miaomiao Li<sup>1</sup>, Mengrong Li<sup>1</sup>, Yanjie Xie<sup>1</sup>, Jingjing Guo<sup>1,2\*</sup>

<sup>1</sup>College of Life Sciences, Nanjing Agricultural University, Nanjing 210095, China

<sup>2</sup>Engineering Research Centre of Applied Technology on Machine Translation and Artificial Intelligence, Faculty of Applied Science, Macao Polytechnic University, Macao 999078, China

[\*] Corresponding author: [guojj@njau.edu.cn](mailto:guojj@njau.edu.cn)

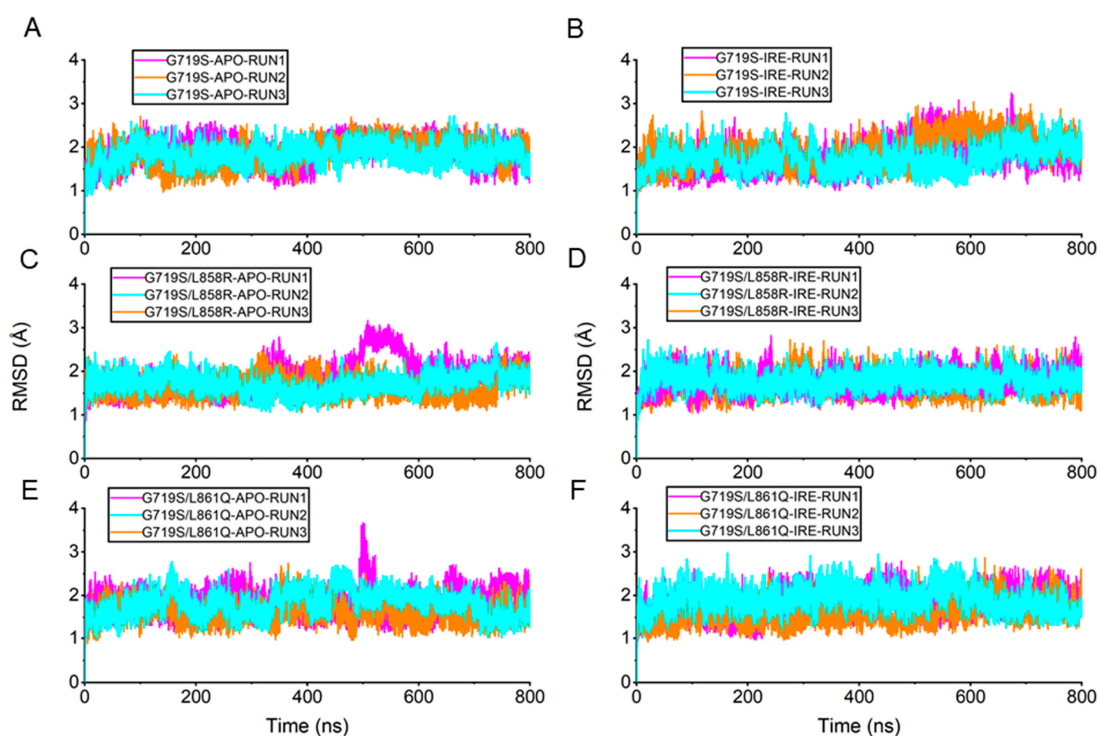

**Figure S1.** The RMSDs of unbound EGFRs and IRE-bound EGFRs as a function of simulation time. (A) G719S-APO; (B) G719S-IRE; (C) G719S/L858R-APO; (D) G719S/L858R-IRE; (E) G719S/L861Q-APO; (F) G719S/L861Q-IRE.

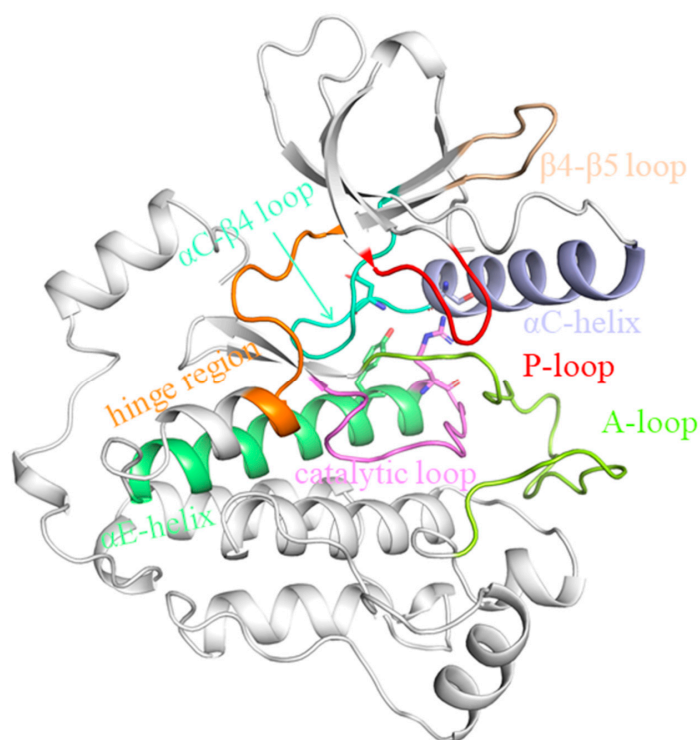

**Figure S2.** The structure of EGFR with important regions highlighted: the P-loop in red, the  $\alpha$ C-helix in light blue, the  $\alpha$ C- $\beta$ 4 loop in green cyan, the  $\beta$ 4- $\beta$ 5 loop in wheat, the hinge region in orange, the  $\alpha$ E-helix in lime, the catalytic loop in violet, and the A-loop in limon.

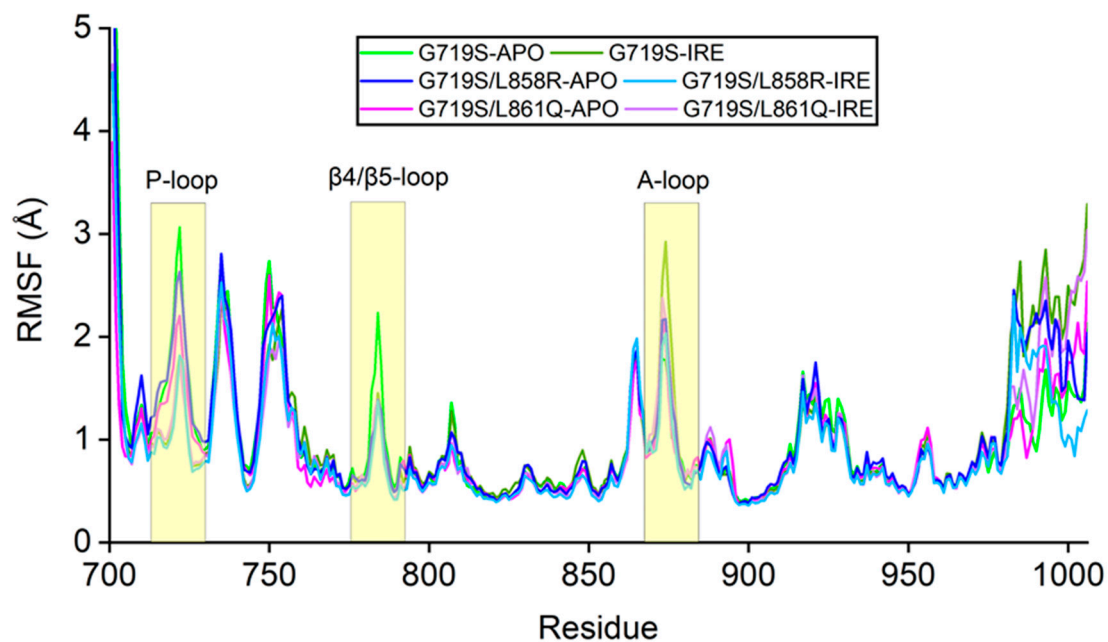

**Figure S3.** The flexibility of EGFRs during the simulations. The average RMSF of each residue in the last 200-ns MD trajectories using the average structure as the reference. Several important regions are highlighted.

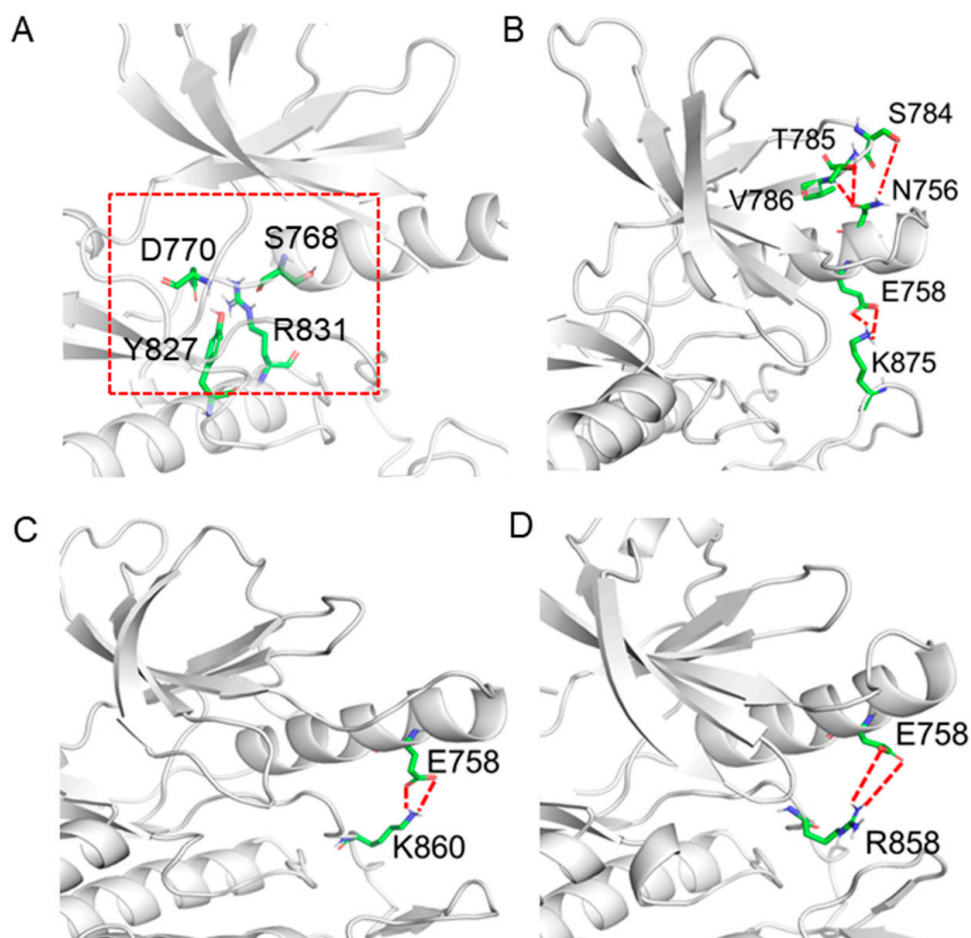

**Figure S4.** The hydrogen-bond interactions contribute to the stability of the  $\alpha$ C-helix. (A) Hydrogen-bond interactions of S768, D770, Y827 and R831 residues in the EGFR kinase domain. (B) Side chains of residues S784, T785 and V786 in the  $\beta$ 4- $\beta$ 5 loop make hydrogen bonds with that of N756 in the  $\alpha$ C-helix. Side chain of K875 in the C terminal of the A-loop makes hydrogen bond with that of E758 in the  $\alpha$ C-helix. (C) Side chain of K860 in the N-terminal of the A-loop makes hydrogen bond with that of E758 in the  $\alpha$ C-helix. (D) Side chain of R858 in the N terminal of the A-loop makes hydrogen bond with that of E758 in the  $\alpha$ C-helix.

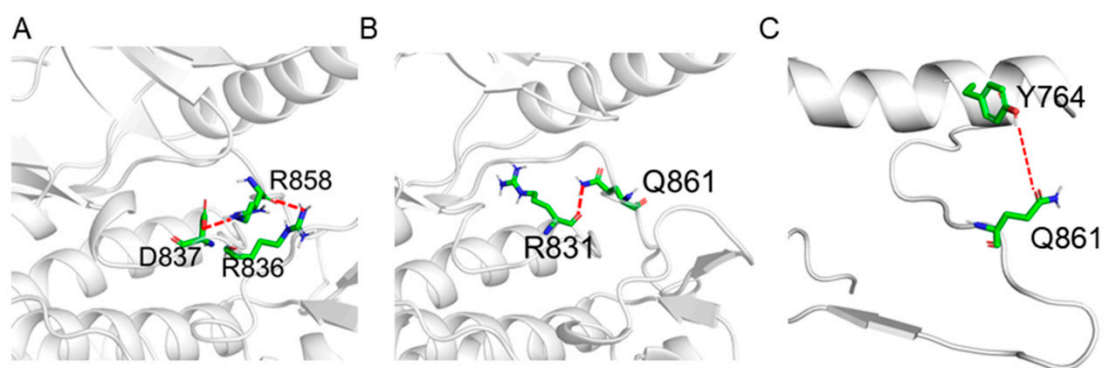

**Figure S5.** The hydrogen-bond interactions introduced by the co-occurring mutated residue. (A) Hydrogen bonds among the side chains of mutated R858 in the A-loop and R836/D837 in the catalytic loop. (B) Hydrogen bond between the side chains of mutated Q861 in the A loop and R831 in the catalytic loop. (C) Hydrogen bond between the side chains of mutated Q861 in the A-loop and Y764 in the  $\alpha$ C-helix.

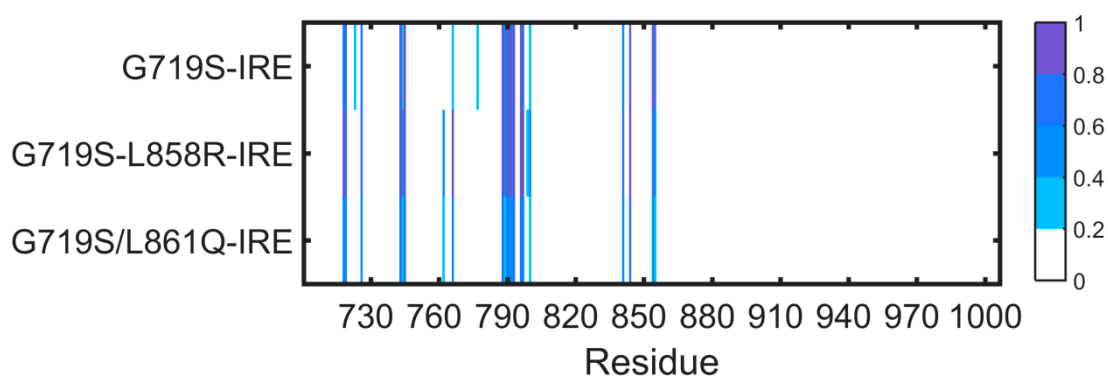

**Figure S6.** Contact map between IRE and EGFR in the three IRE-bound systems. The distance cutoff was set to 5 Å.

**Table S1.** The full names and abbreviations of twenty common amino acids.

| Serial number | Full name     | Abbreviation |
|---------------|---------------|--------------|
| 1             | Glycine       | Gly/G        |
| 2             | Alaine        | Ala/A        |
| 3             | Leucine       | Leu/L        |
| 4             | Isoleucine    | Ile/I        |
| 5             | Valine        | Val/V        |
| 6             | Proline       | Pro/P        |
| 7             | Phenylalanine | Phe/F        |
| 8             | Methionine    | Met/M        |
| 9             | Tryptophan    | Trp/W        |
| 10            | Serine        | Ser/S        |
| 11            | Glutamine     | Gln/Q        |
| 12            | Threonine     | Thr/T        |
| 13            | Cysteine      | Cys/C        |
| 14            | Asparagine    | Asn/N        |
| 15            | Tyrosine      | Tyr/Y        |
| 16            | Aspartic acid | Asp/D        |
| 17            | Glutamic acid | Glu/E        |
| 18            | Lysine        | Lys/K        |
| 19            | Arginine      | Arg/R        |
| 20            | Histidine     | His/H        |

**Table S2.** The full names and abbreviations of nouns in this work.

| Serial number | Full name                       | Abbreviation |
|---------------|---------------------------------|--------------|
| 1             | Gefitinib                       | IRE          |
| 2             | Conventional molecular dynamic  | CMD          |
| 3             | Steered molecular dynamic       | SMD          |
| 4             | Principal component analysis    | PCA          |
| 5             | Root mean square deviation      | RMSD         |
| 6             | Root-mean-square fluctuation    | RMSF         |
| 7             | Radius of gyration              | $R_g$        |
| 8             | Solvent-accessible surface area | SASA         |
